# Supplementary material for: Mortality in Four Waves of COVID-19 Is Differently Associated with Healthcare Capacities Affected by Economic Disparities
Source: MDPI journal article supplement (doi:10.3390/tropicalmed7090241), 2022-09-10
Supplement: s1 [file s1]

# Supplementary Materials for Mortality in Four Waves of COVID-19 is Differently Associated with Healthcare Capacities Affected by Economic Disparities

Lan Yao <sup>1</sup>, J. Carolyn Graff <sup>2</sup>, Lotfi Aleya <sup>3</sup>, Jiamin Ma <sup>1,4</sup>, Yanhong Cao <sup>5</sup>, Wei Wei <sup>5</sup>, Shuqiu Sun <sup>5</sup>, Cong-Yi Wang <sup>6</sup>, Yan Jiao <sup>1</sup>, Weikuan Gu <sup>1,7,\*</sup>, Gang Wang <sup>4</sup> and Dianjun Sun <sup>5,\*</sup>

Daily New Cases in Réunion

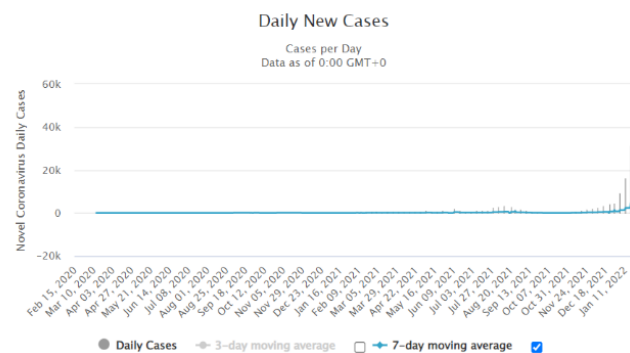

Daily New Cases in Australia

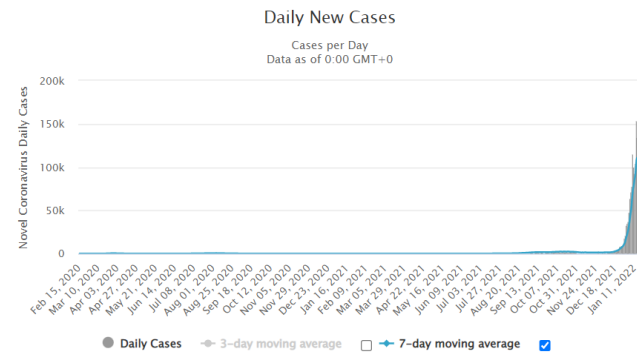

Daily New Cases in the United States

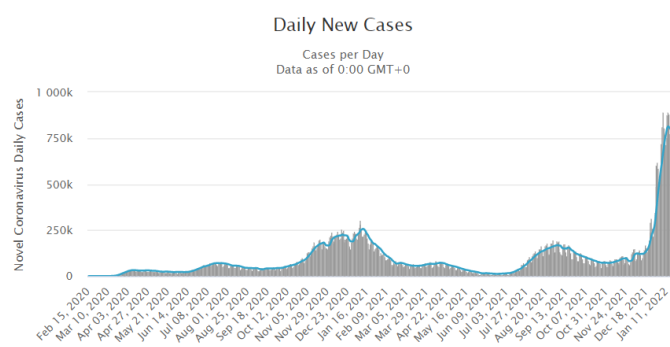

Daily New Cases in Turkey

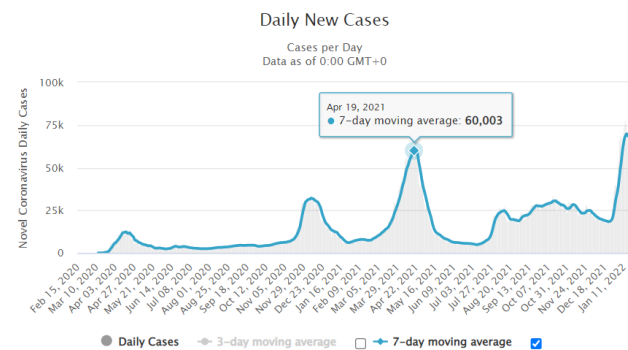

**Figure S1.** Example of visible and non-visible turning points.

**Figure S2.** Correlations of potential influential factors and death rates in four waves.
