# Supplementary material for: Mortality in Four Waves of COVID-19 Is Differently Associated with Healthcare Capacities Affected by Economic Disparities
Source: MDPI journal article supplement (doi:10.3390/tropicalmed7090241), 2022-09-10
Supplement: s1 [file s1]

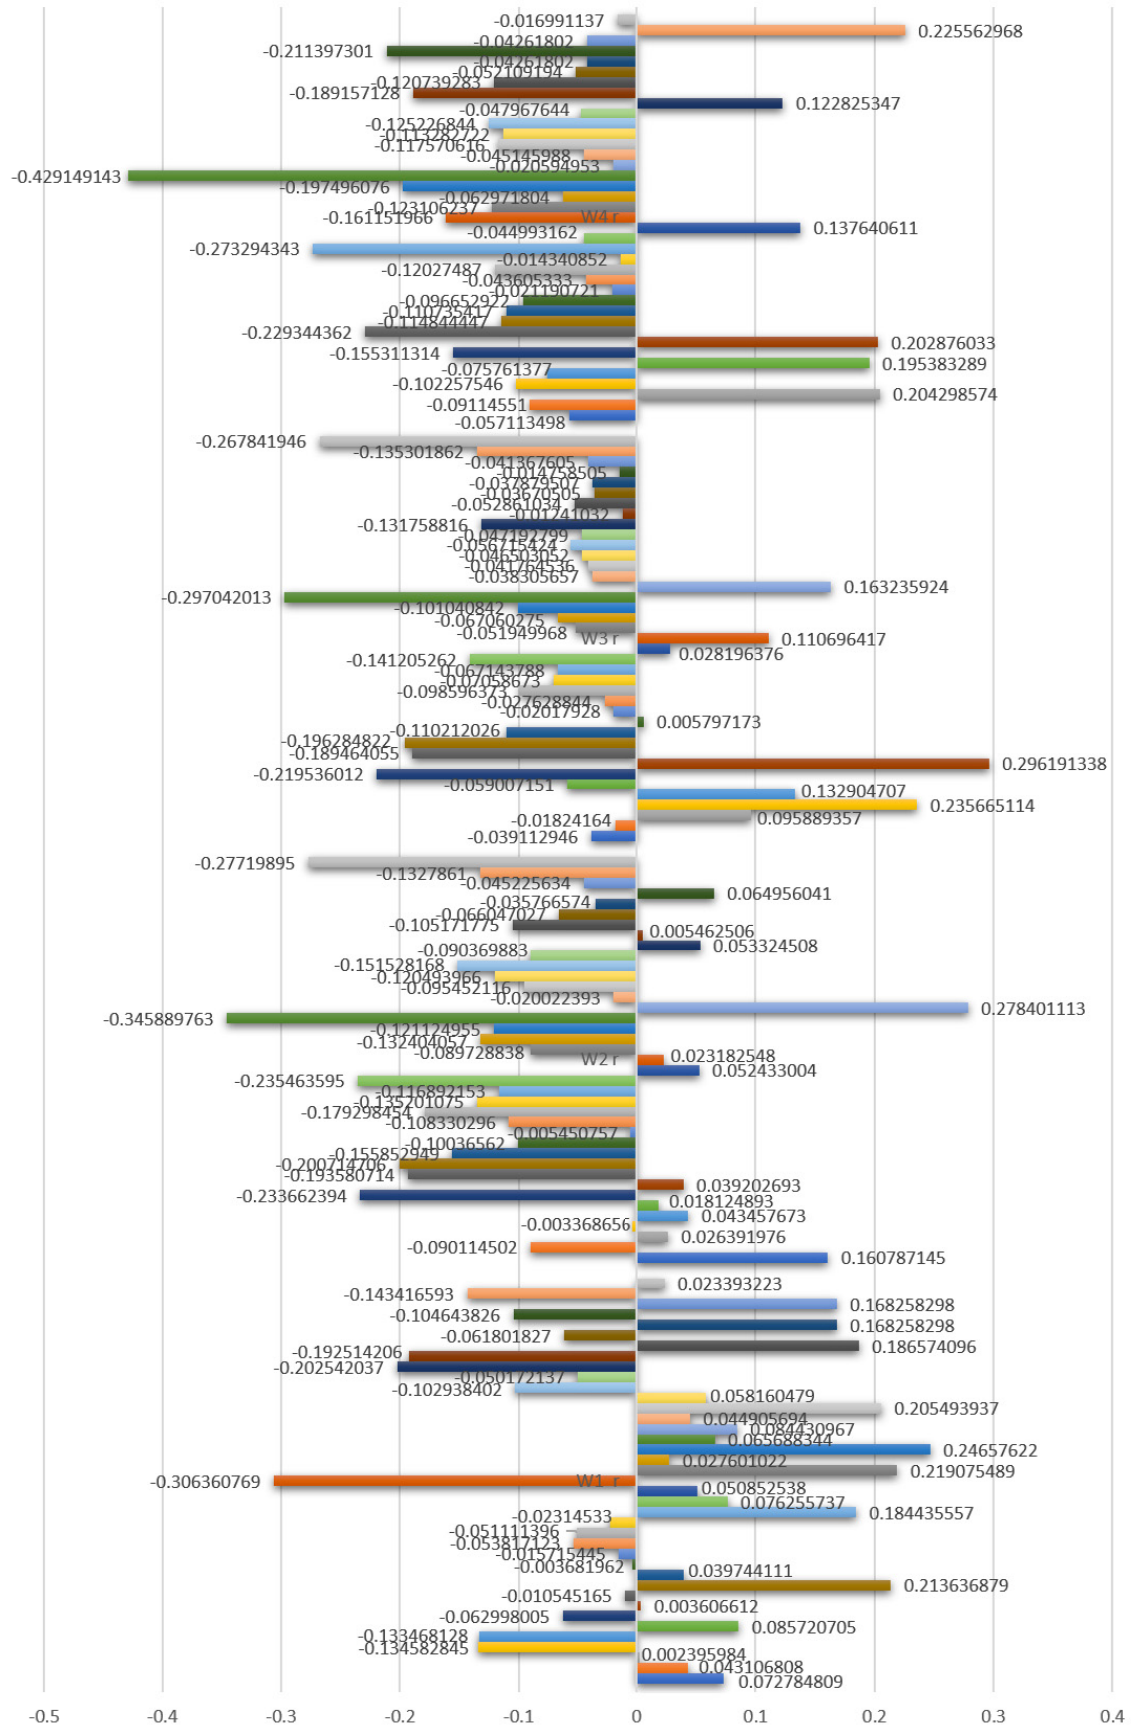

- Immunization
- Prevalence of HIV
- PM2.5 air pollution
- Secure Internet servers
- Annual freshwater withdrawals
- Prevalence of overweight
- Cause of death,
- Literacy rate
- Exports of goods and services
- Expense
- Energy use
- Access to electricity
- Surface area
- Aged 15-64
- Number of Air Passengers Carried
- Poverty ratio
- Population density
- Air transport
- Hospital beds
- Population living in slums
- Gross savings
- Adjusted net savings
- Urban population
- Urban population
- Incidence of tuberculosis
- Rural population
- Air Passengers
- Population in the largest city
- International tourism
- Fixed telephone subscriptions
- Specialist surgical workforce
- Refugee population
- Unemployment, total
- Imports of goods and services
- Foreign direct investment
- CO2 emissions
- Mortality rate 2019
- Forest area
