# Supplementary material for: Mortality in Four Waves of COVID-19 Is Differently Associated with Healthcare Capacities Affected by Economic Disparities
Source: Trop Med Infect Dis. 2022 Sep 10;7(9):241. doi: 10.3390/tropicalmed7090241 (PMC9506267; doi:10.3390/tropicalmed7090241)
Supplement: Supplementary file 1 [file tropicalmed-07-00241-s001.zip › tropicalmed-1850688-Supplementary Tables.xlsx]

## Sheet: Table S1
Table S1. Days, number of cases and deaths at turning point of different waves
#	Country	W1 Case	W1 Ctime	W1 Death	W1Dtime	Death ratio	The weighted average		#	Country	W2 Case	W2 Ctime	W2 Death	W2Dtime	Death ratio	The weighted average			#	Country	W3 Case	W3 Ctime	W3 Death	W3Dtime	Death ratio	The weighted average		#	Country	W4 Case	W4 Ctime	W4 Death	W4Dtime	Death ratio	The weighted average
1	USA	31614	4-07-2020	2268	4-21-2020	0.07174	0.00433		1	USA	70455	7-19-2020	1198	8-04-2020	0.017	0.00104			1	USA	255546	11-12-2021	3472	1-17--2021	0.01359	0.00317		1	USA	168020	09-02-2021	2030	09-23-2021	0.01208	0.00241
2	India	93280	9-17-2020	1166	9-15-2020	0.0125	0.00223		2	India	392322	05-08--2020	4708	0520--2020	0.012	0.00411			2	India						0		2	India						0
3	Brazil	46203	8-04-2020	1041	6-22-2020	0.02253	0.00199		3	Brazil	54804	1-12-2020	1017	1-10-2020	0.01856	0.00089			3	Brazil	77129	3-27-2021	3119	4-01--2021	0.04044	0.00284		3	Brazil	78407	6-23-2021	2073	6-19-2021	0.02644	0.00246
4	France	4537	4-01-2020	975	4-08-2020	0.2149	0.00186		4	France	55282	11-08-2020	667	11-19-2020	0.01207	0.00058			4	France	41441	4-06-2021	313	4-13--2021	0.00755	0.00029		4	France	23783	8-13-2021	107	8-30-2021	0.0045	0.00013
5	Turkey	12400	4-16-2020	122	4-21-2020	0.00984	0.00023		5	Turkey	32096	12-08-2020	256	12-29-2020	0.00798	0.00022			5	Turkey	60266	4-20-2021	356	5-01--2021	0.00591	0.00032		5	Turkey	24820	8-11-2021	277	9-7-2021	0.01116	0.00033
6	Russia	10982	5-12-2020	178	6-03-2020	0.01621	0.00034		6	Russia	28934	12-26-2020	567	12-30-2020	0.0196	0.00049			6	Russia	24978	07-15--2021	810	08-17--2021	0.03243	0.00074		6	Russia	40448	11-6-2021	1249	11-23--2021	0.03088	0.00148
7	UK	4990	4-14-2020	944	4-13-2020	0.18918	0.0018		7	UK	25285	11-16-2020	487	11-28-2020	0.01926	0.00042			7	UK	59551	1-09-2021	1250	1-23--2021	0.02099	0.00114		7	UK	47114	7-21-2021	144	9-21-2021	0.00306	0.00017
8	Italy	5646	3-26-2020	817	4-02-2020	0.1447	0.00156		8	Italy	35289	11-16-2020	741	12-03-2020	0.021	0.00065			8	Italy	22633	3-17-2021	477	4-13--2021	0.02108	0.00043		8	Italy						0
9	Spain	8641	3-20-2020	898	4-03-2020	0.10392	0.00172		9	Spain	20193	10-27-2020	298	11-26-2020	0.01476	0.00026			9	Spain	29571	1-17-2021	488	2-11--2021	0.0165	0.00044		9	Spain	27247	7-19-2021	123	8-27-2021	0.00451	0.00015
10	Germany	5837	4-02-2020	239	4-18-2020	0.04095	0.00046		10	Germany	25775	12-23-2020	905	1-10-2020	0.03511	0.00079			10	Germany	21282	04-20--2021	243	04-16--2021	0.01142	0.00022		10	Germany	58353	11-30-2021	392	12-15-2021	0.00672	0.00046
11	Argentina	14941	10-22-2020	398	10-10-2020	0.02664	0.00076		11	Argentina	11711	1-12-2020	206	1-23-2020	0.01759	0.00018			11	Argentina	33172	05-23--2021	603	06-11--2021	0.01818	0.00055		11	Argentina						0
12	Colombia	11551	8-16-2020	326	8-27-2020	0.02822	0.00062		12	Colombia	9744	11-02-2020	195	11-01-2020	0.02001	0.00017			12	Colombia	17857	1,20-2021	392	1-24--2021	0.02195	0.00036		12	Colombia	17255	4-27-2021	484	5-04-2021	0.02805	0.00057
13	Poland	25611	11-11-2020	506	11-25-2020	0.01976	0.00097		13	Poland	28878	4-01-2020	603	4-14-2020	0.02088	0.00053			13	Poland	23425	12-07--2021	466	01-02-2022	0.01989	0.00042		13	Poland						0
14	Iran	3009	4-02-2020	141	4-06-2020	0.04686	0.00027		14	Iran	13630	12-01-2020	473	11-20--2020	0.0347	0.00041			14	Iran	14102	04-20--2021	436	4,28--2021	0.03092	0.0004		14	Iran	39775	08-17--2021	650	08-25--2021	0.01634	0.00077
15	Mexico	7251	8-02-2020	762	7-23-2020	0.10509	0.00146		15	Mexico	17508	1-23-2020	1280	1-26-2020	0.07311	0.00112			15	Mexico	18801	08-19--2021	745	09-08--2021	0.03963	0.00068		15	Mexico						0
16	Ukraine	13991	11-29-2020	225	12-12-2020	0.01608	0.00043		16	Ukraine	16038	4-08-2020	396	4-18-2020	0.02469	0.00035			16	Ukraine	22323	10-30--2021	680	11-12--2021	0.03046	0.00062		16	Ukraine						0
17	Peru	6580	6-01-2020	288	6-17-2020	0.04377	0.00055		17	Peru	8552	8-19-2020	202	8-11-2020	0.02362	0.00018			17	Peru	6929	2,08-2021	207	2-17--2021	0.02987	0.00019		17	Peru	9401	4-10-2021	377	4-24-2021	0.0401	0.00045
18	Indonesia	1717	7-13-2020	101	7-24-2020	0.05882	0.00019		18	Indonesia	4379	9-26-2020	126	9-23-2020	0.02877	0.00011			18	Indonesia	12865	2,01-2021	309	1-31--2021	0.02402	0.00028		18	Indonesia	50039	07-18--2021	1789	08-02--2021	0.03575	0.00212
19	Czechia	12869	10-28-2020	220	11-07-2020	0.0171	0.00042		19	Czechia	12973	1-10-2020	176	1-12-2020	0.01357	0.00015			19	Czechia	12310	3,05-2021	219	3-13--2021	0.01779	0.0002		19	Czechia	18816	11-30--2021	121	12-07--2021	0.00643	0.00014
20	South Africa	12584	7-19-2020	304	8-10-2020	0.02416	0.00058		20	South Africa	18856	1-12-2020	575	1-16-2020	0.03049	0.0005			20	South Africa	20076	07-08--2021	422	07-26--2021	0.02102	0.00038		20	South Africa	23437	12-17--2021	132	01-17-2022	0.00563	0.00016
21	Netherlands	1120	4-14-2020	151	4-07-2020	0.13482	0.00029		21	Netherlands	10018	10-31-2020	83	11-09-2020	0.00829	7e-05			21	Netherlands	11729	12222020	106	1-09--2021	0.00904	0.0001		21	Netherlands	22472	11-29--2021	64	12-14--2021	0.00285	8e-05
22	Canada	1797	5-03-2020	176	5-06-2020	0.09794	0.00034		22	Canada	8807	1-08-2020	163	1-26-2020	0.01851	0.00014			22	Canada	8767	4,17-2021	51	4-26--2021	0.00582	5e-05		22	Canada	5111	09-19--2021	44	10-19--2021	0.00861	5e-05
23	Chile	6971	6-16-2020	252	6-13-2020	0.03615	0.00048		23	Chile	4193	1-26-2020	102	3-21-2020	0.02433	9e-05			23	Chile	7321	4,14-2021	121	4-17--2021	0.01653	0.00011		23	Chile	7294	06-08--2021	133	07-08--2021	0.01823	0.00016
24	Philippines	4497	8-16-2020	107	9-15-2020	0.02379	0.0002		24	Philippines	10845	4-15-2020	245	4-12-2020	0.02259	0.00021			24	Philippines	21915	09-12--2021	267	08-25--2021	0.01218	0.00024		24	Philippines						0
25	Iraq	4505	9-09-2020	106	7-07-2020	0.02353	0.0002		25	Iraq	7758	4-24-2020	43	4-29-2020	0.00554	4e-05			25	Iraq	11985	08-02--2021	77	08-27--2021	0.00642	7e-05		25	Iraq						0
26	Romania	8521	11-18-2020	167	12-03-2020	0.0196	0.00032		26	Romania	5666	3-31-2020	171	4-24-2020	0.03018	0.00015			26	Romania	15022	10-20--2021	485	11-02--2021	0.03229	0.00044		26	Romania						0
27	Sweden	1089	6-18-2020	98	4-16-2020	0.08999	0.00019		27	Sweden	7136	12-23-2020	99	12-31-2020	0.01387	9e-05			27	Sweden						0		27	Sweden						0
28	Belgium	1453	4-15-2020	286	4-14-2020	0.19683	0.00055		28	Belgium	17802	10-31-2020	205	11-11-2020	0.01152	0.00018			28	Belgium	18623	12-01--2021	50	12-07--2021	0.00268	5e-05		28	Belgium						0
29	Pakistan	5800	6-16-2020	129	6-21-2020	0.02224	0.00025		29	Pakistan	3261	12-09-2020	84	12-24-2020	0.02576	7e-05			29	Pakistan	5694	04-24--2021	141	0504--2021	0.02476	0.00013		29	Pakistan	4759	08-07--2021	99	08-31--2021	0.0208	9e-05
30	Portugal	914	4-03-2020	32	4-13-2020	0.03501	6e-05		30	Portugal	5817	11-19-2020	89	12-16-2020	0.0153	8e-05			30	Portugal	12890	1,28-2021	291	2,01--2021	0.02258	0.00027		30	Portugal	3328	07-23--2021	15	08-09--2021	0.00451	2e-05
31	Israel	628	4-03-2020	10	4-19-2020	0.01592	2e-05		31	Israel	6222	9-29-2020	39	10-06-2020	0.00627	3e-05			31	Israel	8395	1,14-2021	65	1,25--2021	0.00774	6e-05		31	Israel	9748	09-03--2021	30	09-07--2021	0.00308	4e-05
32	Hungary	5685	12-03-2020	177	12-23-2020	0.03113	0.00034		32	Hungary	9253	3-26-2020	269	4-13-2020	0.02907	0.00023			32	Hungary	10146	11-29--2021	191	12-08--2021	0.01883	0.00017		32	Hungary						0
33	Bangladesh	3811	7-02-2020	45	7-06-2020	0.01181	9e-05		33	Bangladesh	2186	11-24-2020	33	12-05-2020	0.0151	3e-05			33	Bangladesh	7000	4,09-2021	100	4,21--2021	0.01429	9e-05		33	Bangladesh	11912	07-16--2021	212	-7-15--2021	0.0178	0.00025
34	Jordan	5678	11-22-2020	79	11-16-2020	0.01391	0.00015		34	Jordan	8343	3-21-2020	97	3-28-2020	0.01163	8e-05			34	Jordan	5000	12-10--2021	37	12-26--2021	0.0074	3e-05		34	Jordan						0
35	Serbia	384	4-19-2020	6	4-06-2020	0.01563	1e-05		35	Serbia	417	7-28-2020	13	7-15-2020	0.03118	1e-05			35	Serbia	7278	12042020	59	12042020	0.00811	5e-05		35	Serbia	5037	3,23-2021	40	4,08-2021	0.00794	5e-05
36	Switzerland	1112	3-25-2020	57	4-06-2020	0.05126	0.00011		36	Switzerland	8238	11-06-2020	110	12-15-2020	0.01335	0.0001			36	Switzerland	2769	09-09--2021	9	09-28--2021	0.00325	1e-05		36	Switzerland						0
37	Japan	566	4-15-2020	23	5-05-2020	0.04064	4e-05		37	Japan	1442	8-09-2020	14	8-31-2020	0.00971	1e-05			37	Japan	6429	1,13-2021	100	2,06--2021	0.01555	9e-05		37	Japan	23157	08-26--2021	65	09-15--2021	0.00281	8e-05
38	Austria	754	3-28-2020	22	4-10-2020	0.02918	4e-05		38	Austria	7465	11-13-2020	130	12-21-2020	0.01741	0.00011			38	Austria	3315	4,01-2021	34	04-14--2021	0.01026	3e-05		38	Austria	14125	11-22--2021	62	12-07--2021	0.00439	7e-05
39	UAE	875	5-24-2020	10	5-10-2020	0.01143	2e-05		39	UAE	3755	1-30-2020	16	2-22-2020	0.00426	1e-05			39	UAE	2129	06-27--2021	6	06-28--2021	0.00282	1e-05		39	UAE						0
40	Lebanon	4801	1-16-2021	77	2-07-2021	0.01604	0.00015		40	Lebanon	3263	05-14--2020	55	05-20--2020	0.01686	5e-05			40	Lebanon	1642	08-13--2021	13	09-12--2021	0.00792	1e-05		40	Lebanon						0
41	Morocco	203	4-22-2020	8	4-8-2020	0.03941	2e-05		41	Morocco	5206	11-17-2020	80	11,21-2020	0.01537	7e-05			41	Morocco	9774	08-10--2021	111	08-22--2021	0.01136	0.0001		41	Morocco						0
42	Malaysia	171	4-07-2020	5	4-04-2020	0.02924	1e-05		42	Malaysia	4685	2-03-2020	17	2,09-2020	0.00363	1e-05			42	Malaysia	7736	06-03--2021	96	06-08--2021	0.01241	9e-05		42	Malaysia	21799	08-30--2021	409	09-16--2021	0.01876	0.00048
43	Nepal	3839	10-21-2020	36	11-30-2020	0.00938	7e-05		43	Nepal	8944	05-13--2020	200	05-21--2020	0.02236	0.00017			43	Nepal	2603	08-11--2021	32	08-13--2021	0.01229	3e-05		43	Nepal						0
44	Saudi Arabia	4417	6-20-2020	53	7-06-2020	0.012	0.0001		44	Saudi Arabia	1394	07-02--2020	17	06-14--2020	0.0122	1e-05			44	Saudi Arabia						0		44	Saudi Arabia						0
45	Bulgaria	3387	11-19-2020	140	12-02-2020	0.04133	0.00027		45	Bulgaria	3669	3-30-2020	125	4-04-2020	0.03407	0.00011			45	Bulgaria	4783	10-29--2021	173	11-14--2021	0.03617	0.00016		45	Bulgaria						0
46	Ecuador	1371	4-24-2020	220	5-03-2020	0.16047	0.00042		46	Ecuador	1343	9-18-2020	97	10-09-2020	0.07223	8e-05			46	Ecuador	2205	05-05--2021	93	04-28--2021	0.04218	8e-05		46	Ecuador						0
47	Slovakia	2547	11-04-2020	92	1-04-2021	0.03612	0.00018		47	Slovakia	3260	1-06-2020	102	3-03-2020	0.03129	9e-05			47	Slovakia	8817	12-04--2021	94	12-20--2021	0.01066	9e-05		47	Slovakia						0
48	Belarus	954	5-17-2020	7	7-08-2020	0.00734	1e-05		48	Belarus	1922	12-15-2020	10	1-02-2020	0.0052	1e-05			48	Belarus	2053	10-26--2021	17	10-23--2021	0.00828	2e-05		48	Belarus						0
49	Greece	2673	11-18-2020	101	12-02-2020	0.03779	0.00019		49	Greece	3075	4-05-2020	83	4-19-2020	0.02699	7e-05			49	Greece	6813	11-11--2021	96	12-08--2021	0.01409	9e-05		49	Greece						0
50	Panama	1165	7-16-2020	30	7-23-2020	0.02575	6e-05		50	Panama	3618	1-12-2020	48	1,17-2020	0.01327	4e-05			50	Panama	1088	07-09--2021	7	07-17--2021	0.00643	1e-05		50	Panama						0
51	Kazakhstan	1779	7-15-2020	38	8-02-2020	0.02136	7e-05		51	Kazakhstan	1451	1-29-2020	11	1-26-2020	0.00758	1e-05			51	Kazakhstan	2772	04-25--2021	37	05-27--2021	0.01335	3e-05		51	Kazakhstan	7704	08-09--2021	118	08-11--2021	0.01532	0.00014
52	Croatia	3647	12-13-2020	79	12-21-2020	0.02166	0.00015		52	Croatia	2207	4-21-2020	47	5-02-2020	0.0213	4e-05			52	Croatia	5459	11-12--2021	67	11-26--2021	0.01227	6e-05		52	Croatia						0
53	Bolivia	1703	7-23-2020	111	8-05-2020	0.06518	0.00021		53	Bolivia	2257	2-01-2020	61	2-09-2020	0.02703	5e-05			53	Bolivia	2834	06-12--202186	86	06-18--2021	0.03035	8e-05		53	Bolivia						0
54	Georgia	4474	12-10-2020	46	12-24-2020	0.01028	9e-05		54	Georgia	1502	05-11--2020	26	05-23--2020	0.01731	2e-05			54	Georgia	5025	08-18--2021	80	09-04--2021	0.01592	7e-05		54	Georgia	4875	11-09--2021	80	11-16--2021	0.01641	9e-05
55	Azerbaijan	558	7-05-2020	9	7-26-2020	0.01613	2e-05		55	Azerbaijan	4174	12-14-2020	42	12-14-2020	0.01006	4e-05			55	Azerbaijan	2248	4-13-2021	34	4-11--2021	0.01512	3e-05		55	Azerbaijan	3851	09-02--2021	42	09-03--2021	0.01091	5e-05
56	Tunisia	1775	10-23-2020	77	11-09-2020	0.04338	0.00015		56	Tunisia	2880	1-15-2020	80	1-22-2020	0.02778	7e-05			56	Tunisia	2158	4-21-2021	82	4-28--2021	0.038	7e-05		56	Tunisia	8026	07-13--2021	197	08-04--2021	0.02455	0.00023
57	Paraguay	841	9-09-2020	23	9-24-2020	0.02735	4e-05		57	Paraguay	2419	4-24-2020	9	5-01-2020	0.00372	1e-05			57	Paraguay	3044	05-27--2021	141	06-12--2021	0.04632	0.00013		57	Paraguay						0
58	Palestine	352	7-21-2020	4	7-14-2020	0.01136	1e-05		58	Palestine	740	9-17-2020	8	9-16-2020	0.01081	1e-05			58	Palestine	2065	12062020	26	1-,23-2020	0.01259	2e-05		58	Palestine	2500	4-09-2021	26	4-22-2021	0.0104	3e-05
59	Kuwait	958	5-22-2020	9	5-16-2020	0.00939	2e-05		59	Kuwait	778	9-10-2020	7	10-19-2020	0.009	1e-05			59	Kuwait	1474	4,13-2021	10	3-27--2021	0.00678	1e-05		59	Kuwait	1828	07-06--2021	16	07-12--2021	0.00875	2e-05
60	Costa Rica	1330	10-11-2020	20	10-11-2020	0.01504	4e-05		60	Costa Rica	1262	11-28-2020	18	12-09-2020	0.01426	2e-05			60	Costa Rica	2717	05-15--2021	32	05-22--2021	0.01178	3e-05		60	Costa Rica	2524	09-11--2021	35	09-21--2021	0.01387	4e-05
61	Dominican Republic	1510	7-31-2020	25	9-03-2020	0.01656	5e-05		61	Dominican Republic	1741	1-21-2020	24	2-07-2020	0.01379	2e-05			61	Dominican Republic	1344	06-02--2021	8	07-02--2021	0.00595	1e-05		61	Dominican Republic	1137	11-16--2021	4	11-03--2021	0.00352	0
62	Denmark	328	4-08-2020	17	4-07-2020	0.05183	3e-05		62	Denmark	3525	12-20-2020	32	1-23-2020	0.00908	3e-05			62	Denmark						0		62	Denmark						0
63	Ethiopia	1595	8-26-2020	22	8-22-2020	0.01379	4e-05		63	Ethiopia	2137	4-07-2020	32	4-21-2020	0.01497	3e-05			63	Ethiopia	1473	08-29--2021	47	10-04--2021	0.03191	4e-05		63	Ethiopia	4230	12-31--2021	17	01-18-2022	0.00402	2e-05
64	Lithuania	3159	12-24-2020	48	12-31-2020	0.01519	9e-05		64	Lithuania	1216	05-03--2020	14	04-27--2020	0.01151	1e-05			64	Lithuania	2952	11-01--2021	36	11-03--2021	0.0122	3e-05		64	Lithuania						0
65	Ireland	955	4-16-2020	69	4-25-2020	0.07225	0.00013		65	Ireland	6532	1-10-2020	60	2-04-2020	0.00919	5e-05			65	Ireland						0		65	Ireland						0
66	Moldova	1484	12-09-2020	26	12-20-2020	0.01752	5e-05		66	Moldova	1641	3,28-2020	45	4-06-2020	0.02742	4e-05			66	Moldova	1669	10-23--2021	59	11-15--2021	0.03535	5e-05		66	Moldova						0
67	Slovenia	1884	10-30-2020	53	12-08-2020	0.02813	0.0001		67	Slovenia	1045	09-18--2020	7	09-28--2020	0.0067	1e-05			67	Slovenia	3341	11-11-2-21	20	11-23--2021	0.00599	2e-05		67	Slovenia						0
68	Egypt	1575	6-16-2020	89	6-20-2020	0.05651	0.00017		68	Egypt	1378	1-03-2020	57	1-03-2020	0.04136	5e-05			68	Egypt	1193	05-17--2021	63	05-07--2021	0.05281	6e-05		68	Egypt	936	11-03--2021	67	11-18--2021	0.07158	8e-05
69	Guatemala	1349	7-18-2020	44	7-16-2020	0.03262	8e-05		69	Guatemala	1392	04-19--2020	32	04-20--2020	0.02299	3e-05			69	Guatemala	3900	08-24--2021	66	09-07--2021	0.01692	6e-05		69	Guatemala						0
70	Uruguay	3925	4-10-2021	64	4-15-2021	0.01631	0.00012		70	Uruguay	3867	05-26--2020	61	06-09--2020	0.01577	5e-05			70	Uruguay						0		70	Uruguay						0
71	Honduras	874	7-04-2020	26	7-08-2020	0.02975	5e-05		71	Honduras	891	7-22-2020	43	7-31-2020	0.04826	4e-05			71	Honduras	840	9032020	29	8-31-2020	0.03452	3e-05		71	Honduras	803	10-22-,020	19	10-02-2020	0.02366	2e-05
72	Armenia	649	6-29-2020	13	6-26-2020	0.02003	2e-05		72	Armenia	2091	11-02-2020	30	11-06-2020	0.01435	3e-05			72	Armenia	944	3,28-2021	22	4-13-2021	0.02331	2e-05		72	Armenia	1977	10-27--2021	51	11-12--2021	0.0258	6e-05
73	Venezuela	1143	8-07-2020	9	8-14-2020	0.00787	2e-05		73	Venezuela	1124	9-09-2020	9	9-14-2020	0.00801	1e-05			73	Venezuela	1418	4,06-2021	20	4-23-2021	0.0141	2e-05		73	Venezuela	1429	06-09--2021	19	06-19--2021	0.0133	2e-05
74	Qatar	1887	6-03-2020	4	6-21-2020	0.00212	1e-05		74	Qatar	975	4-16-2020	8	4-21-2020	0.00821	1e-05			74	Qatar	4101	01-17--2021	2	01-20--2021	0.00049	0		74	Qatar						0
75	Oman	1577	7-15-2020	12	8-04-2020	0.00761	2e-05		75	Oman	1278	4-14-2020	17	4-12-2020	0.0133	1e-05			75	Oman	2019	06-21--2021	45	07-04--2021	0.02229	4e-05		75	Oman						0
76	Bosnia and Herzegovina	1613	11-06-2020	59	11-17-2020	0.03658	0.00011		76	Bosnia and Herzegovina	1942	3-28-2020	80	3-28-2020	0.04119	7e-05			76	Bosnia and Herzegovina	1942	05-28--2021	24	06-09--2021	0.01236	2e-05		76	Bosnia and Herzegovina	793	09-18--2021	36	10-16--2021	0.0454	4e-05
77	Bahrain	563	06-28-2020	4	07-03--2020	0.0071	1e-05		77	Bahrain	720	09-18--2020	4	10-01-2020	0.00556	0			77	Bahrain	2895	05-28--2021	23	06-07--2021	0.00794	2e-05		77	Bahrain						0
78	Libya	1034	10-30-2020	14	10-18-2020	0.01354	3e-05		78	Libya	957	3-19-2020	23	3-23-2021	0.02403	2e-05			78	Libya	957	05-20--2021	14	04-28--2021	0.01463	1e-05		78	Libya	2855	08-01--2021	27	08-03-2021	0.00946	3e-05
79	Nigeria	643	7-02-2020	15	6-22-2020	0.02333	3e-05		79	Nigeria	1661	1-22-2020	14	1-20-2021	0.00843	1e-05			79	Nigeria	685	08-24--2021	27	09-02--2021	0.03942	2e-05		79	Nigeria	1953	12-26--2021	5	01-12-2022	0.00256	1e-05
80	Kenya	675	8-01-2020	14	8-03-2020	0.02074	3e-05		80	Kenya	1108	11-15-2020	23	11-15-2020	0.02076	2e-05			80	Kenya	1336	3-31-2020	21	4-14-2020	0.01572	2e-05		80	Kenya	1305	08-17--2021	33	08-28--2021	0.02529	4e-05
81	North Macedonia	161	6-18-2,020	9	7-03-2020	0.0559	2e-05		81	North Macedonia	1099	11-22-2020	33	12-01-2020	0.03003	3e-05			81	North Macedonia	1133	4-04-2021	43	4-08-2021	0.03795	4e-05		81	North Macedonia	1007	08-25--2021	30	09-02--2021	0.02979	4e-05
82	Myanmar	1505	10-12-2020	36	10-20-2020	0.02392	7e-05		82	Myanmar	5831	07-22--2020	375	08-01--2021	0.06431	0.00033			82	Myanmar						0		82	Myanmar						0
83	Sri Lanka	501	10-29-2020	5	11-29-2020	0.00998	1e-05		83	Sri Lanka	702	12-13-2020	5	1-15-2021	0.00712	0			83	Sri Lanka	901	2-14-2021	7	2,18-2021	0.00777	1e-05		83	Sri Lanka	3169	05-25--2021	67	06-14--2021	0.02114	8e-05
84	Albania	799	12-12-2020	17	12-08-2020	0.02128	3e-05		84	Albania	1111	2-11-2020	21	3-07-2021	0.0189	2e-05			84	Albania	884	09-14--2021	13	09-30--2021	0.01471	1e-05		84	Albania						0
85	S. Korea	645	3-05-2020	7	3-30-2020	0.01085	1e-05		85	S. Korea	343	8-29-2020	4	9-14-2020	0.01166	0			85	S. Korea	1047	12-26-2020	23	1-23-2021	0.02197	2e-05		85	S. Korea	6897	12-18--2021	76	12-25--2021	0.01102	9e-05
86	Latvia	1010	1-10-2021	25	1-11-2021	0.02475	5e-05		86	Latvia	708	05-12--2020	10	05-19--2021	0.01412	1e-05			86	Latvia	2495	10-27--2021	40	11-17--2021	0.01603	4e-05		86	Latvia						0
87	Estonia	1513	3-21-2021	13	4-11-2021	0.00859	2e-05		87	Estonia	1817	11-03--2020	12	11-03--2021	0.0066	1e-05			87	Estonia						0		87	Estonia						0
88	Algeria	188	3-27-2020	22	4-10-2020	0.11702	4e-05		88	Algeria	623	7-29-2020	12	7-24-2020	0.01926	1e-05			88	Algeria	1063	11-28-2020	20	11-28-2020	0.01881	2e-05		88	Algeria	1503	07-31--2021	38	08-07--2021	0.02528	5e-05
89	Cuba	54	4-13-2020	3	4-17-2020	0.05556	1e-05		89	Cuba	1124	4-26-2020	12	5,04-2021	0.01068	1e-05			89	Cuba	9413	08-25--2021	88	08-10--2021	0.00935	8e-05		89	Cuba						0
90	Norway	271	3-29-2020	9	4-08-2020	0.03321	2e-05		90	Norway	680	1-10-2020	7	1,06-2021	0.01029	1e-05			90	Norway	1461	09-05--2021	4	04-22--2021	0.00274	0		90	Norway	4856	12-14--2021	14	12-14--2021	0.00288	2e-05
91	Kyrgyzstan	1074	7-25-2020	35	7-24-2020	0.03259	7e-05		91	Kyrgyzstan	544	10-30--2020	5	11-25--2020	0.00919	0			91	Kyrgyzstan	1467	07-06--2021	12	07-29--2021	0.00818	1e-05		91	Kyrgyzstan						0
92	Thailand	21784	08-17-2021	262	08-23-2021	0.01203	0.0005		92	Thailand						0			92	Thailand						0		92	Thailand						0
93	Montenegro	339	9-26-2020	8	11-14-2020	0.0236	2e-05		93	Montenegro	625	11-15-2020	11	3,11-2021	0.0176	1e-05			93	Montenegro	638	08-28--2021	8	09-07--2021	0.01254	1e-05		93	Montenegro	2463	01-11-2022	6	01-22-2022	0.00244	1e-05
94	Uzbekistan	754	8-09-2020	7	8-27-2020	0.00928	1e-05		94	Uzbekistan	622	09-20--2020	7	09-17--2020	0.01125	1e-05			94	Uzbekistan	917	08-08--2021	7	07-28--2021	0.00763	1e-05		94	Uzbekistan						0
95	Ghana	761	7-09-2020	6	6-20-2020	0.00788	1e-05		95	Ghana	782	7-30-2020	6	8,21-2020	0.00767	1e-05			95	Ghana	788	1-31-2021	11	2-16-2021	0.01396	1e-05		95	Ghana	587	08-27--2021	8	08-16--2021	0.01363	1e-05
96	Zambia	301	7-31-2020	10	7,-7-2020	0.03322	2e-05		96	Zambia	1411	1-17-2020	18	1,31-2021	0.01276	2e-05			96	Zambia	2790	06-27--2021	61	07-03--2021	0.02186	6e-05		96	Zambia	3871	01-04--2021	9	01-12--2021	0.00232	1e-05
97	China	4670	2-13-2020	123	2-19-2020	0.02634	0.00023		97	China						0			97	China						0		97	China						0
98	Finland	165	4-10-2020	14	4-23-2020	0.08485	3e-05		98	Finland	467	12-03-2020	8	12,23-2020	0.01713	1e-05			98	Finland	731	3,20-2021	5	3-31-2021	0.00684	0		98	Finland						0
99	Cameroon	459	6-21-2020	13	6-20-2020	0.02832	2e-05		99	Cameroon	1382	4-04-2020	19	4,01-2021	0.01375	2e-05			99	Cameroon	985	10-02--2021	13	09-30--2021	0.0132	1e-05		99	Cameroon						0
100	El Salvador	433	8-10-2020	13	8-10-2020	0.03002	2e-05		100	El Salvador	365	1-19-2020	11	1,20-2021	0.03014	1e-05			100	El Salvador	334	09-24--2021	16	10-08--2021	0.0479	1e-05		100	El Salvador						0
101	Cyprus	617	1-03-2021	4	12-25-2020	0.00648	1e-05		101	Cyprus	870	4-25-2020	4	5,07-2021	0.0046	0			101	Cyprus	1023	07-20--2021	4	08-22--2021	0.00391	0		101	Cyprus	4600	01-08-2022	6	01-22-2022	0.0013	1e-05
102	Mozambique	215	9-20-2020	3	9-27-2020	0.01395	1e-05		102	Mozambique	954	2-01-2020	13	2,07-2021	0.01363	1e-05			102	Mozambique	1893	08-01--2021	26	07-28--2021	0.01373	2e-05		102	Mozambique	3028	01-03-2022	10	01-06-2022	0.0033	1e-05
103	Luxembourg	136	3-28-2020	5	4-11-2020	0.03676	1e-05		103	Luxembourg	685	11-05-2020	7	11,30-2020	0.01022	1e-05			103	Luxembourg						0		103	Luxembourg						0
104	Afghanistan	758	6-05-2020	25	7-07-2020	0.03298	5e-05		104	Afghanistan	241	12-06-2020	18	12,07-2020	0.07469	2e-05			104	Afghanistan	1871	06-23--2021	88	06-23--2021	0.04703	8e-05		104	Afghanistan						0
105	Singapore	1006	4-26-2020	1	-	0.00099	0		105	Singapore	3707	10-30--2020	14	10-30--2021	0.00378	1e-05			105	Singapore						0		105	Singapore						0
106	Namibia	252	8-26-2020	4	8-29-2020	0.01587	1e-05		106	Namibia	480	12,31-2020	6	1-06-2021	0.0125	1e-05			106	Namibia	1798	06-31--2021	80	07-17--2021	0.04449	7e-05		106	Namibia	1089	12-24--2021	15	01-14-2022	0.01377	2e-05
107	Vietnam	14088	08-31-2021	410	08-28-2021	0.0291	0.00078		107	Vietnam						0			107	Vietnam						0		107	Vietnam						0
108	Mongolia	1223	04-24-2021	8	05-11-2021	0.00654	2e-05		108	Mongolia	2496	06-21--2020	15	07-03--2021	0.00601	1e-05			108	Mongolia	3839	09-08--2021	18	10-03--2021	0.00469	2e-05		108	Mongolia						0
109	Botswana	482	03-04-2021	13	03-09-2021	0.02697	2e-05		109	Botswana	2269	08-05--2020	39	08-13--2021	0.01719	3e-05			109	Botswana	1502	12-30--2021	7	01-10-2022	0.00466	1e-05		109	Botswana						0
110	Zimbabwe	201	08-02-2020	6	08-28-2020	0.02985	1e-05		110	Zimbabwe	924	01-11--2020	43	01-22--2021	0.04654	4e-05			110	Zimbabwe	2355	07-15--2021	78	07-29--2021	0.03312	7e-05		110	Zimbabwe	4580	12-14--2021	20	01-03-2022	0.00437	2e-05
111	Uganda	845	12-12-2020	11	01-07-2021	0.01302	2e-05		111	Uganda	1775	06-17--2020	67	06-28--2021	0.03775	6e-05			111	Uganda	1610	01-05-2022	11	01-19-2022	0.00683	1e-05		111	Uganda						0
112	Reunion						0		112	Reunion						0			112	Reunion						0		112	Reunion						0
113	Laos	1444	12-17-2021	10	12-31-2021	0.00693	2e-05		113	Laos						0			113	Laos						0		113	Laos						0
114	Rwanda	353	01-302021	5	01-26-2021	0.01416	1e-05		114	Rwanda	1437	07-24--2020	15	07-14--2021	0.01044	1e-05			114	Rwanda	1295	01-04-2022	5	01-11-2022	0.00386	0		114	Rwanda						0
115	Cambodia	744	05-05-2021	5	05-15-2021	0.00672	1e-05		115	Cambodia	981	07-06--2020	29	07-08--2021	0.02956	3e-05			115	Cambodia	861	09-30--2021	22	09-29--2021	0.02555	2e-05		115	Cambodia						0
116	Jamaica	176	09-22-2020	5	09-22-2020	0.02841	1e-05		116	Jamaica	679	05-20--2020	10	05-19--2021	0.01473	1e-05			116	Jamaica	708	09-09--2021	19	09-07--2021	0.02684	2e-05		116	Jamaica	1426	01-17-2022	7	01-19-2022	0.00491	1e-05
117	Maldives	1626	05-24-2021	6	05-25-2021	0.00369	1e-05		117	Maldives						0			117	Maldives						0		117	Maldives						0
118	Trinidad and Tobago	123	09-14-2020	3	09-13-2020	0.02439	1e-05		118	Trinidad and Tobago	542	05-26--2020	16	05-28--2021	0.02952	1e-05			118	Trinidad and Tobago	783	12-10--2021	27	12-24--2021	0.03448	2e-05		118	Trinidad and Tobago						0
119	Australia								119	Australia									119	Australia								119	Australia
Summary		523437	710110085	16825	732928065	4.20519					1146874	578867803	19711	534505789	2.16941						1097568	159146907	19806	134018709	1.865					843459	26231144	12219	27876794	0.80237
Average						0.03594	0.03214								0.01937	0.01719									0.0168	0.01489								0.01459	0.00688
R						0.2028	0.64508								0.56922	0.34026									0.49787	0.7908
P						1e-05	0.00248						0.0145, for wave 1,2,3,and 4 respectively.		0.22911	0.86759									0.00731	0.21315
R						0.06467	0.79547								0.47892	0.24633
P						2e-05	0.00037								0.22911	0.86759
R						-0.04041	0.53748
P						0.00024	0.00137

## Sheet: Table S2
Table S2. Correlations between influential factors and death rate at turning pints of four waves.
Factors	Wave 1	R	P-T-test	Wave2	R	P-T-test	Wave 3	R	P-T-test	Wave 4	R	P-T-test
income economies（1：low-income economies 2：lower middle-income economies 3：upper middle-income economies 4：high-income economies		0.253	0		-0.31	0		-0.263	0		-0.33	0
GDP (current US$)(2018)		0.193	0.001		-0.021	0.002		-0.032	0.004		-0.085	0.016
GNI per capita, Atlas method (current US$)(2018)		0.346	0		-0.293	0		-0.284	0		-0.394	0
Immunization, measles (% of children ages 12-23 months)(2018)		0.023	0		-0.277	0		-0.268	0		-0.017	0
Population density (people per sq. km of land area)(2018)		-0.103	0.001		-0.152	0.003		-0.057	0		-0.125	0
Poverty headcount ratio at $1.90 a day (2011 PPP)(2016)		-0.193	0		0.005	0		-0.012	0		-0.189	0
Prevalence of HIV, total (% of population ages 15-49)(2018)		-0.105	0.001		0.065	0.001		-0.015	0.001		-0.211	0.006
School enrollment, secondary (% gross)(2017)		0.385	0		-0.234	0		-0.282	0		-0.048	0
Population aged 15-64, percent, 2019		-0.143	0		-0.133	0		-0.135	0		0.226	0
Population aged 65 and older, percent, 2019		0.366	0		-0.085	0		-0.146	0		-0.237	0
Life expectancy at birth (years), 2019		0.368	0		-0.185	0		-0.272	0		-0.091	0
Top Countries in Number of Air Passengers Carried 2019 https://www.nationmaster.com/nmx/ranking/number-of-air-passengers-carried		0.168	0		-0.045	0		-0.041	0.001		-0.043	0.009
Ownership of Passenger Cars (units per thousand persons) https://en.wikipedia.org/wiki/List_of_countries_by_vehicles_per_capita#cite_note-21		0.334	0		-0.209	0		-0.261	0		-0.329	0
Population, total(2018)		-0.008	0		0.011	0		0.365	0		0.187	0
Forest area (% of land area) 2019		0.073	0		0.161	0		-0.039	0		-0.057	0
Rural population (% of total population) 2019		0.043	0.106		-0.09	0.161		-0.018	0.161		-0.091	0.162
Surface area (sq. km)2018		0.002	0		0.026	0		0.096	0		0.204	0.003
Mortality rate, under-5 (per 1,000 live births)2019		-0.135	0		-0.003	0		0.236	0		-0.102	0
Incidence of tuberculosis (per 100,000 people)2019		-0.133	0		0.043	0		0.133	0		-0.076	0
Access to electricity (% of population)2019		0.086	0		0.018	0		-0.059	0		0.195	0
CO2 emissions (metric tons per capita)2018		-0.063	0		-0.234	0		-0.22	0		-0.155	0
Urban population2019		0.004	0		0.039	0		0.296	0		0.203	0
Energy use (kg of oil equivalent per capita)2014		-0.011	0		-0.194	0		-0.189	0		-0.229	0
Urban population (% of total population)2019		0.214	0		-0.201	0		-0.196	0		-0.115	0
Adjusted net savings, including particulate emission damage (% of GNI)2019		0.04	0		-0.156	0		-0.11	0		-0.111	0
Expense (% of GDP)2019		-0.004	0.087		-0.1	0.165		0.006	0.165		-0.097	0.166
Foreign direct investment, net inflows (BoP, current US$)2019		-0.016	0		-0.005	0.001		-0.02	0		-0.021	0
Gross savings (% of GDP)2019		-0.054	0.078		-0.108	0.122		-0.028	0.122		-0.044	0.123
Exports of goods and services (% of GDP)2019		-0.051	0.184		-0.179	0		-0.099	0		-0.12	0.002
Imports of goods and services (% of GDP)2019		-0.023	0.069		-0.135	0.069		-0.071	0.069		-0.014	0.068
Government expenditure on education, total (% of GDP)2019		0.184	0.031		-0.117	0.013		-0.067	0.014		-0.273	0.072
Literacy rate, youth total (% of people ages 15-24)2019		0.076	0.071		-0.235	0.071		-0.141	0.071		-0.045	0.07
Unemployment, total (% of total labor force) (modeled ILO estimate)2019		0.051	0		0.052	0		0.028	0		0.138	0
Population living in slums (% of urban population)2018		-0.306	0		0.023	0		0.111	0		-0.161	0
Cause of death, by communicable diseases and maternal, prenatal and nutrition conditions (% of total)2019		0.219	0.186		-0.09	0.188		-0.052	0.192		-0.123	0.213
Refugee population by country or territory of origin 2019		0.028	0.022		-0.132	0.032		-0.067	0.036		-0.063	0.04
Hospital beds (per 1,000 people) 2017		0.247	0		-0.121	0		-0.101	0		-0.197	0.011
Prevalence of overweight, weight for height (% of children under 5) 2019		0.066	0.072		-0.346	0.072		-0.297	0.072		-0.429	0.071
Specialist surgical workforce (per 100,000 population)2018		0.084	0.002		0.278	0.002		0.163	0.005		-0.021	0.107
Air transport, registered carrier departures worldwide 2019		0.045	0.002		-0.02	0.004		-0.038	0		-0.045	0
Annual freshwater withdrawals, total (billion cubic meters) 2017		0.205	0.108		-0.095	0.121		-0.042	0.146		-0.118	0.158
Fixed telephone subscriptions (per 100 people) 2019		0.058	0.068		-0.12	0.068		-0.047	0.068		-0.113	0.068
Fixed broadband subscriptions (per 100 people) 2019		0.417	0		-0.14	0		-0.221	0		-0.315	0
Secure Internet servers (per 1 million people) 2019		-0.05	0.142		-0.09	0.142		-0.047	0.16		-0.048	0.172
International tourism, receipts (% of total exports)2019		-0.203	0		0.053	0		-0.132	0		0.123	0
Researchers in R&D (per million people) 2018		0.366	0		-0.14	0		-0.308	0		-0.416	0
PM2.5 air pollution, population exposed to levels exceeding WHO guideline value (% of total) 2017		0.187	0.06		-0.105	0.062		-0.053	0.066		-0.121	0.098
Population in the largest city (% of urban population)2019		-0.062	0.319		-0.066	0.319		-0.037	0.32		-0.052	0.322
Top Countries in Number of Air Passengers Carried 2019 https://www.nationmaster.com/nmx/ranking/number-of-air-passengers-carried		0.168	0		-0.036	0		-0.038	0.001		-0.043	0.009

## Sheet: Table S3
Table S3. Relationship of income, GNI and R and D to death rates at four waves.
Country	income economies	GNI per capita, Atlas method (current US$)(2018)	Researchers in R&D (per million people) 2018	W1 Death ratio	W2 Death ratio	W3 Death ratio	W4 Death ratio
Afghanistan	1	550		0.03298	0.07469	0.04703
Albania	3	5210		0.02128	0.0189	0.01471
Algeria	2	3920		0.11702	0.01926	0.01881	0.02528
Argentina	4	12390	1211.42	0.02664	0.01759	0.01818
Armenia	3	4220		0.02003	0.01435	0.02331	0.0258
Austria	4	49350	5733.08	0.02918	0.01741	0.01026	0.00439
Azerbaijan	3	4480		0.01613	0.01006	0.01512	0.01091
Bahrain	4	21890		0.0071	0.00556	0.00794
Bangladesh	2	1750		0.01181	0.0151	0.01429	0.0178
Belarus	3	5700		0.00734	0.0052	0.00828
Belgium	4	45870	5023.26	0.19683	0.01152	0.00268
Bolivia	3	9080		0.06518	0.02703	0.03035
Bosnia and Herzegovina	3	6080	471.25	0.03658	0.04119	0.01236	0.0454
Botswana	3	6640		0.02697	0.01719	0.00466
Brazil	3	9080		0.02253	0.01856	0.04044	0.02644
Bulgaria	3	9630	2342.87	0.04133	0.03407	0.03617
Cambodia	2	1500		0.00672	0.02956	0.02555
Cameroon	2	1520		0.02832	0.01375	0.0132
Canada	4	44950		0.09794	0.01851	0.00582	0.00861
Chile	4	14670		0.03615	0.02433	0.01653	0.01823
China	3	9460	1307.12	0.02634
Colombia	3	6180		0.02822	0.02001	0.02195	0.02805
Costa Rica	3	11530	345.039	0.01504	0.01426	0.01178	0.01387
Croatia	4	14530	1921.13	0.02166	0.0213	0.01227
Cuba	3	8630		0.05556	0.01068	0.00935
Cyprus	4	26110	1255.85	0.00648	0.0046	0.00391	0.0013
Czechia	4	20230	3862.67	0.0171	0.01357	0.01779	0.00643
Denmark	4	60170	8065.89	0.05183	0.00908
Dominican Republic	3	7760		0.01656	0.01379	0.00595	0.00352
Ecuador	3	6110		0.16047	0.07223	0.04218
Egypt	2	2800	686.717	0.05651	0.04136	0.05281	0.07158
El Salvador	2	3630	71.1755	0.03002	0.03014	0.0479
Estonia	4	23170	3755.33	0.00859	0.0066
Ethiopia	1	890		0.01379	0.01497	0.03191	0.00402
Finland	4	48300	6861.11	0.08485	0.01713	0.00684
France	4	41090	4715.32	0.2149	0.01207	0.00755	0.0045
Georgia	3	4270	1463.77	0.01028	0.01731	0.01592	0.01641
Germany	4	47110	5211.87	0.04095	0.03511	0.01142	0.00672
Ghana	2	2130		0.00788	0.00767	0.01396	0.01363
Greece	4	17930	3482.72	0.03779	0.02699	0.01409
Guatemala	3	4490	12.8712	0.03262	0.02299	0.01692
Honduras	2	2180		0.02975	0.04826	0.03452	0.02366
Hungary	4	15890	3237.7	0.03113	0.02907	0.01883
India	2	2020	252.704	0.0125	0.012
Indonesia	2	3840	215.994	0.05882	0.02877	0.02402	0.03575
Iran	3	5470		0.04686	0.0347	0.03092	0.01634
Iraq	3	4680	111.137	0.02353	0.00554	0.00642
Ireland	4	61210	5243.13	0.07225	0.00919
Israel	4	40930		0.01592	0.00627	0.00774	0.00308
Italy	4	33740	2306.77	0.1447	0.021	0.02108
Jamaica	3	4670		0.02841	0.01473	0.02684	0.00491
Japan	4	41310	5331.15	0.04064	0.00971	0.01555	0.00281
Jordan	3	4310		0.01391	0.01163	0.0074
Kazakhstan	3	8080	666.935	0.02136	0.00758	0.01335	0.01532
Kenya	2	1840		0.02074	0.02076	0.01572	0.02529
Kuwait	4	34290	513.86	0.00939	0.009	0.00678	0.00875
Kyrgyzstan	2	1160		0.03259	0.00919	0.00818
Laos	2	2520		0.00693
Latvia	4	17880	1792.1	0.02475	0.01412	0.01603
Lebanon	3	5370		0.01604	0.01686	0.00792
Libya	3	4960		0.01354	0.02403	0.01463	0.00946
Lithuania	4	19620	3190.7	0.01519	0.01151	0.0122
Luxembourg	4	80860	4941.7	0.03676	0.01022
Malaysia	3	10590	2184.72	0.02924	0.00363	0.01241	0.01876
Maldives	3	6490		0.00369
Mexico	3	9180		0.10509	0.07311	0.03963
Moldova	2	3900	696.078	0.01752	0.02742	0.03535
Mongolia	2	3740		0.00654	0.00601	0.00469
Montenegro	3	7900	734.3	0.0236	0.0176	0.01254	0.00244
Morocco	2	3090		0.03941	0.01537	0.01136
Mozambique	1	460		0.01395	0.01363	0.01373	0.0033
Myanmar	2	1350		0.02392	0.06431
Namibia	3	4500		0.01587	0.0125	0.04449	0.01377
Nepal	2	1190		0.00938	0.02236	0.01229
Netherlands	4	51260	9.7e-05	0.13482	0.00829	0.00904	0.00285
Nigeria	2	1960		0.02333	0.00843	0.03942	0.00256
North Macedonia	3	5750	799.272	0.0559	0.03003	0.03795	0.02979
Norway	4	80640	6466.7	0.03321	0.01029	0.00274	0.00288
Oman	4	14170	281.161	0.00761	0.0133	0.02229
Pakistan	2	1590		0.02224	0.02576	0.20317	0.0208
Palestine			2.38e-05	0.01136	0.01081	0.01259	0.0104
Panama	4	14370		0.02575	0.01327	0.00643
Paraguay	3	5180	139.734	0.02735	0.00372	0.04632
Peru	3	6470		0.04377	0.02362	0.02987	0.0401
Philippines	2	3830		0.02379	0.02259	0.01218
Poland	4	14100	3106.12	0.01976	0.02088	0.01989
Portugal	4	21980	4537.53	0.03501	0.0153	0.02258	0.00451
Qatar	4	61150	577.348	0.00212	0.00821	0.00049
Romania	3	11300	882.441	0.0196	0.03018	0.03229
Russia	3	10230	2784.33	0.01621	0.0196	0.03243	0.03088
Rwanda	1	780		0.01416	0.01044	0.00386
S. Korea	4	30620	2.11e-05	0.01085	0.01166	0.02197	0.01102
Saudi Arabia	4	21600		0.012	0.0122
Serbia	3	6390	2087.22	0.01563	0.03118	0.00811	0.00794
Singapore	4	58770		0.00099	0.00378
Slovakia		18920	2995.96	0.03612	0.03129	0.01066
Slovenia	4	25360	4854.57	0.02813	0.0067	0.00599
South Africa	3	5750		0.02416	0.03049	0.02102	0.00563
Spain	4	29300	3000.89	0.10392	0.01476	0.0165	0.00451
Sri Lanka	2	3720	6.41e-06	0.00998	0.00712	0.00777	0.02114
Sweden	4	55540	7536.48	0.08999	0.01387
Switzerland	4	84450		0.05126	0.01335	0.00325
Thailand	3	7040		0.01203
Trinidad and Tobago	4	15420	566.971	0.02439	0.02952	0.03448
Tunisia	2	3300	1771.61	0.04338	0.02778	0.038	0.02455
Turkey	3	10420		0.00984	0.00798	0.00591	0.01116
UAE	4	40880	2378.89	0.01143	0.00426	0.00282
Uganda	1	800		0.01302	0.03775	0.00683
UK	4	41790	4603.31	0.18918	0.01926	0.02099	0.00306
Ukraine	2	2660	988.077	0.01608	0.02469	0.03046
Uruguay	4	15790		0.01631	0.01577
USA	4	63170	696.376	0.07174	0.017	0.01359	0.01208
Uzbekistan	2	1740	476.179	0.00928	0.01125	0.00763
Venezuela		13080		0.00787	0.00801	0.0141	0.0133
Vietnam	2	2650		0.0291
Zambia	2	1160		0.03322	0.01276	0.02186	0.00232
Zimbabwe	2	1140		0.02985	0.04654	0.03312	0.00437

## Sheet: Table S4
Table S4. The death rates at turning points in the largest wave of CRs of different income levels.
High income	Death ratio	Upp middle	Death ratio	Middle low	Death ratio
USA	0.013587	Brazil	0.026439	India	0.012
France	0.012065	Turkey	0.005907	Iran	0.016342
UK	0.02099	Russia	0.030879	Ukraine	0.030462
Italy	0.020998	Argentina	0.018178	Indonesia	0.035752
Spain	0.016503	Colombia	0.021952	Philippines	0.012183
Germany	0.035112	Mexico	0.039626	Pakistan	0.022241
Poland	0.020881	Peru	0.040102	Bangladesh	0.017338
Czechia	0.006431	South Africa	0.005632	Morocco	0.011357
Netherlands	0.002848	Iraq	0.006425	Nepal	0.022361
Canada	0.018508	Romania	0.032286	Bolivia	0.030346
Chile	0.016528	Jordan	0.011627	Tunisia	0.024545
Sweden	0.013873	Serbia	0.008107	Palestine	0.0104
Belgium	0.002685	Lebanon	0.016038	Egypt	0.056508
Portugal	0.022576	Malaysia	0.018762	Honduras	0.04826
Israel	0.007743	Bulgaria	0.03617	Nigeria	0.00256
Hungary	0.018825	Ecuador	0.042177	Kenya	0.015719
Switzerland	0.013353	Belarus	0.008281	Sri Lanka	0.021142
Japan	0.002807	Panama	0.013267	Algeria	0.025283
Austria	0.017415	Kazakhstan	0.015317	Kyrgyzstan	0.00818
UAE	0.004261	Georgia	0.01592	Uzbekistan	0.007634
Saudi Arabia	0.011999	Azerbaijan	0.010062	Ghana	0.013959
Slovakia	0.010661	Paraguay	0.046321	Zambia	0.021864
Greece	0.014091	Costa Rica	0.011778	Cameroon	0.013748
Croatia	0.012273	Domi-Repu	0.013785	El Salvador	0.030023
Kuwait	0.008753	Moldova	0.035351	Afghanistan	0.047034
Denmark	0.009078	Guatemala	0.016923	Vietnam	0.029103
Lithuania	0.015195	Armenia	0.014347	Mongolia	0.004689
Ireland	0.009186	Bosnia & Her	0.041195	Zimbabwe	0.004367
Slovenia	0.005986	Libya	0.009457	Laos	0.006925
Uruguay	0.016306	North Mac$	0.037952	Cambodia	0.029562
Qatar	0.000488	Myanmar	0.064311	Total	0.631887
Oman	0.022288	Albania	0.018902	Average	0.021063
Bahrain	0.007945	Cuba	0.009349
S. Korea	0.021968	Montenegro	0.012539
Latvia	0.016032	China	0.026338
Estonia	0.006604	Namibia	0.013774
Norway	0.002883	Botswana	0.017188
Thailand	0.012027	Jamaica	0.004909
Finland	0.00684	Maldives	0.00369
Cyprus	0.001304	Total	0.821262
Luxembourg	0.010219	Average	0.021058
Singapore	0.003777
Total	0.548372
Average	0.012753

## Sheet: Table S5
Table S5. Time and case number adjusted mortality rate in CRs of different income levels.
#	High income	W1	W2	W3	W4		#	Upper level	W1	W2	W3	W4		#	Middle low	W1	W2	W3	W4
1	USA	0.018853	0.003112	0.00582	0.00401		3	Brazil	0.008105	0.004173	0.009758	0.006027		2	India	0.009474	0.010356	0	0
4	France	0.008105	0.001733	0.000525	0.000211		5	Turkey	0.00095	0.00105	0.001114	0.000805		14	Iran	0.001146	0.00104	0.003399	0.003634
7	UK	0.007847	0.001265	0.002095	0.000284		6	Russia	0.001386	0.002327	0.002534	0.003631		16	Ukraine	0	0.000495	0.003087	0.003801
8	Italy	0.006791	0.001925	0.0008	0		11	Argentina	0	0.001633	0.000644	0.001753		18	Indonesia	0.000821	0.000277	0.002409	0.010001
9	Spain	0.007465	0.000774	0.000818	0.000243		12	Colombia	0.002538	0.0008	0.001226	0.001407		24	Philippines	0.000869	0	0.00191	0.001493
10	Germany	0.001987	0.002351	0.000407	0.000774		15	Mexico	0.005933	0.005252	0.0043	0		29	Pakistan	0.001048	0.000185	0.001099	0.000553
13	Poland	0	0.001314	0.001011	0.000921		17	Peru	0.002242	0.000829	0.000512	0.001096		33	Bangladesh	0.000366	7.26e-05	0.00078	0.001185
19	Czechia	0	0.000571	0.000295	0.000433		20	South Africa	0.002367	0.002359	0.001915	0.000384		41	Morocco	6.5e-05	0.000176	0.000865	0
21	Netherlands	0.001255	0.000216	0.000178	0.000126		25	Iraq	0.000825	0	0.000135	0.000193		43	Nepal	0	7.92e-05	0.001559	0.000179
22	Canada	0.001463	0.000423	8.55e-05	8.69e-05		26	Romania	0	0.000685	0.000535	0.001318		53	Bolivia	0.000902	0.000134	0.00067	0
23	Chile	0.002095	0.000265	0.000203	0.000263		34	Jordan	0	0.000324	0.000303	0.000169		56	Tunisia	0	0.000169	0.000624	0.000458
27	Sweden	0.000815	0.000257	0	0		35	Serbia	4.67e-05	5.33e-05	0.00071	0.000116		58	Palestine	3.25e-05	1.76e-05	0.000203	0.000145
28	Belgium	0.002377	0.000532	8.38e-05	0		40	Lebanon	0	0.000316	0.000172	8.05e-05		68	Egypt	0.000723	0.000125	0.000491	0.000375
30	Portugal	0.000266	0.000231	0.000488	2.96e-05		42	Malaysia	3.89e-05	6.98e-05	8.78e-05	0.001189		71	Honduras	0.000211	9.46e-05	0.000226	0.000106
31	Israel	8.31e-05	0.000101	0.000109	5.93e-05		45	Bulgaria	0	0.000574	0.000391	0.000474		79	Nigeria	0.000122	3.08e-05	0.000211	2.8e-05
32	Hungary	0	0.00046	0.000451	0.000377		46	Ecuador	0.001713	0.000398	0.000498	0		80	Kenya	0.000114	5.06e-05	0.000164	0.000184
36	Switzerland	0.000474	0.000286	1.51e-05	0		48	Belarus	5.45e-05	4.1e-05	3.34e-05	0		83	Sri Lanka	0	1.1e-05	3.9e-05	3.91e-05
37	Japan	0.000191	3.64e-05	0.000168	0.000128		50	Panama	0.000234	0.000197	4.52e-05	0		88	Algeria	0.000179	2.64e-05	0.000156	0.000212
38	Austria	0.000183	0.000338	5.7e-05	0.000122		51	Kazakhstan	0.000296	4.51e-05	6.57e-05	0.000343		91	Kyrgyzstan	0.000284	1.1e-05	9.36e-05	0
39	UAE	8.31e-05	4.16e-05	1.01e-05	0		54	Georgia	0	0.000189	8.13e-05	0.000253		94	Uzbekistan	5.69e-05	1.54e-05	5.46e-05	0
44	Saudi Arabia	0.000441	0	2.85e-05	0		55	Azerbaijan	7.01e-05	0.000172	7.08e-05	0.000122		95	Ghana	4.88e-05	1.32e-05	8.58e-05	4.47e-05
47	Slovakia	0	0.000239	0.000171	0.000186		57	Paraguay	0.000179	0	2.82e-05	3.29e-05		96	Zambia	8.13e-05	3.96e-05	0.000476	5.03e-05
49	Greece	0	0.000262	0.000139	0.00019		60	Costa Rica	0	8.21e-05	5.63e-05	0.000113		99	Cameroon	0.000106	0	0.000148	7.27e-05
52	Croatia	0	0.000205	7.88e-05	0.000132		61	Dominican Republic	0.000195	9.85e-05	5.8e-05	1.16e-05		100	El Salvador	0.000106	2.42e-05	0.000125	0
59	Kuwait	7.48e-05	1.82e-05	1.68e-05	3.16e-05		66	Moldova	0	0.000107	0.000141	0.000133		104	Afghanistan	0.000203	3.96e-05	0.000686	0
62	Denmark	0.000141	8.31e-05	0	0		69	Guatemala	0.000343	0	0.0001	0.000261		107	Vietnam	0	0	0.003197	0
64	Lithuania	0	0.000125	2.35e-05	7.11e-05		72	Armenia	0.000101	0.000123	4.24e-05	0.000148		108	Mongolia	0	0	6.24e-05	8.39e-05
65	Ireland	0.000574	0.000156	0	0		76	Bosnia and Herzegovina	0	0.000242	0.00025	0.000233		110	Zimbabwe	4.88e-05	9.46e-05	0.000608	0.000112
67	Slovenia	0	0.000138	1.17e-05	3.95e-05		78	Libya	0	5.74e-05	7.2e-05	6.69e-05		113	Laos			7.8e-05	0
70	Uruguay	0.000532	0	0.000102	0		81	North Macedonia	7.01e-05	0.000135	0.000106	8.72e-05		115	Cambodia			3.9e-05	0.000162
74	Qatar	3.32e-05	0	1.34e-05	3.95e-06		82	Myanmar	0	0.000148	0.001173	0
75	Oman	9.97e-05	0	2.85e-05	8.89e-05		84	Albania	0	6.98e-05	6.57e-05	4.86e-05
77	Bahrain	3.32e-05	1.04e-05	3.86e-05	0		89	Cuba	2.34e-05	0	3.75e-05	0.000292
85	S. Korea	5.82e-05	1.04e-05	3.86e-05	0.00015		93	Montenegro	6.23e-05	4.51e-05	3.51e-05	1.74e-05
86	Latvia	0.000208	0	1.68e-05	7.9e-05		97	China	0.000958	0	0	0
87	Estonia	0.000108	0	2.01e-05	0		106	Namibia	3.11e-05	2.46e-05	7.03e-05	4.36e-05
90	Norway	7.48e-05	1.82e-05	6.71e-06	2.77e-05		109	Botswana	0	0	4.07e-05	0.000113
92	Thailand	0.002178	0	0	0		116	Jamaica	3.89e-05	0	3.13e-05	3.03e-05
98	Finland	0.000116	2.08e-05	8.38e-06	0		117	Maldives	0	0	1.88e-05	0
101	Cyprus	3.32e-05	0	6.71e-06	7.9e-06
103	Luxembourg	4.16e-05	1.82e-05	0	0
105	Singapore	8.31e-06	0	2.35e-05	0
118	Trinidad and Tobago	2.49e-05	0	2.68e-05	5.33e-05

## Sheet: Table S6
Table S6. Additional data for wave 4 from CRs with 50000 case or more.
	Income Level	Cases	Time for Case turning point	Deaths	Time for death turning point
Guadeloupe	high	2314	08-19-2021	30	08-31-2021	0.012965	2.74e-05
Angola	Low mid	552	10-06-2021	16	09-28-2021	0.028986	1.46e-05
Senegal	Low mid	979	07-23-2021	18	08-11-2021	0.018386	1.64e-05
DRC							0
Malawi	low	896	12-25-2021	8	01-21-2022	0.008929	7.3e-06
Martinique	upp or high	1158	08-10-2021	24	08-27-2021	0.020725	2.19e-05
Ivory Coast	low mid	318	09-02-2021	9	09-17-2021	0.028302	8.21e-06
French Guiana							0
Suriname	up mid	525	09-18-2021	9	10-08-2021	0.017143	8.21e-06
Eswatini	Low mid	761	08-10-2021	12	08-23-2021	0.015769	1.09e-05
Malta							0
Iceland							0
Fiji	up mid	1111	07-21-2021	14	07-23-2021	0.012601	1.28e-05
Guyana	up mid	232	09-24-2021	7	09-16-2021	0.030172	6.38e-06
Madagascar							0
Mauritania	low mid	317	08-01-2021	7	08-12-2021	0.022082	6.38e-06
Sudan							0
Cabo Verde
Syria	low	325	09-30-2021	12	09-28-2021	0.036923	1.09e-05
